# Supplementary material
Source: MDPI journal article supplement (https://www.mdpi.com/2504-4990/3/3/36)
Supplement: s1 [file s1]

# Cancer transcriptome panel

[illegible]
